# Supplementary material for: Physiological Response of Spotted Seabass (Lateolabrax maculatus) to Different Dietary Available Phosphorus Levels and Water Temperature: Changes in Growth, Lipid Metabolism, Antioxidant Status and Intestinal Microbiota
Source: MDPI journal article supplement (doi:10.3390/antiox12122128), 2023-12-16
Supplement: s1 [file s1]

## Supplementary material

Table S1. Formulation and proximate composition of experimental diets.

| <b>Ingredients (%, dry basis)</b> | <b>0.35%P</b> | <b>0.55%P</b> | <b>0.71%P</b> | <b>0.82%P</b> | <b>0.92%P</b> |
|-----------------------------------|---------------|---------------|---------------|---------------|---------------|
| Deboned fishmeal                  | 15.00         | 15.00         | 15.00         | 15.00         | 15.00         |
| Casein                            | 22.00         | 22.00         | 22.00         | 22.00         | 22.00         |
| Wheat gluten                      | 8.00          | 8.00          | 8.00          | 8.00          | 8.00          |
| Corn dextrin                      | 35.00         | 35.00         | 35.00         | 35.00         | 35.00         |
| Squid paste                       | 3.00          | 3.00          | 3.00          | 3.00          | 3.00          |
| Fish oil                          | 7.00          | 7.00          | 7.00          | 7.00          | 7.00          |
| Soybean oil                       | 3.00          | 3.00          | 3.00          | 3.00          | 3.00          |
| Lecithin                          | 2.00          | 2.00          | 2.00          | 2.00          | 2.00          |
| Mineral premix <sup>a</sup>       | 0.50          | 0.50          | 0.50          | 0.50          | 0.50          |
| Vitamin premix <sup>b</sup>       | 0.40          | 0.40          | 0.40          | 0.40          | 0.40          |
| Vitamin C                         | 0.10          | 0.10          | 0.10          | 0.10          | 0.10          |
| Choline chloride                  | 0.50          | 0.50          | 0.50          | 0.50          | 0.50          |
| Taurine                           | 0.10          | 0.10          | 0.10          | 0.10          | 0.10          |
| Y <sub>2</sub> O <sub>3</sub>     | 0.10          | 0.10          | 0.10          | 0.10          | 0.10          |
| Microcrystalline cellulose        | 3.52          | 3.22          | 2.91          | 2.71          | 2.51          |
| NaH <sub>2</sub> PO <sub>4</sub>  | 0.00          | 0.49          | 0.98          | 1.31          | 1.64          |
| K <sub>2</sub> HPO <sub>4</sub>   | 0.00          | 0.35          | 0.69          | 0.93          | 1.16          |
| KCl                               | 1.00          | 0.70          | 0.41          | 0.20          | 0.00          |
| NaCl                              | 0.78          | 0.54          | 0.30          | 0.15          | 0.00          |
| <b>Proximate composition</b>      |               |               |               |               |               |
| Crude protein                     | 43.74         | 43.21         | 43.92         | 43.16         | 43.27         |
| Crude lipid                       | 12.45         | 12.37         | 12.38         | 12.63         | 12.46         |
| Phosphorus (%)                    | 0.36          | 0.56          | 0.72          | 0.83          | 0.94          |
| Available phosphorus (%)          | 0.35          | 0.55          | 0.71          | 0.82          | 0.92          |

<sup>a</sup>Vitamin premix (mg/kg diet): VB<sub>1</sub>, 10; riboflavin, 8; pyridoxine HCl, 10; VB<sub>12</sub>, 0.2; VK<sub>3</sub>, 10; inositol, 100; pantothenic acid, 20; niacin acid, 50; folic acid, 2; biotin, 2; VA (500,000 IU), 400; VD<sub>3</sub>, 5; VE (500,000 IU), 100; ethoxyquin, 150; wheat middling, 3132.8.

<sup>b</sup>Mineral premix (mg/kg diet): MgSO<sub>4</sub>·H<sub>2</sub>O, 2000; MnSO<sub>4</sub>·H<sub>2</sub>O, 40; ZnSO<sub>4</sub>·H<sub>2</sub>O, 150; CuSO<sub>4</sub>·5H<sub>2</sub>O, 15; FeSO<sub>4</sub>·H<sub>2</sub>O, 230; Na<sub>2</sub>SeO<sub>3</sub> (1%), 50; CoSO<sub>4</sub> (5%), 20; KI (1%), 100; Zeolite, 2395.

Table S2. Sequences of primers used for RT-qPCR.

| Target gene     | Primer sequence (5'-3')                               | Amplicon length (bp) | Amplification efficiency |
|-----------------|-------------------------------------------------------|----------------------|--------------------------|
| <i>β-actin</i>  | F: CAACTGGGATGACATGGAGAAG<br>R: TTGGCTTTGGGGTTCAGG    | 159                  | 102.65%                  |
| <i>napiiia</i>  | F: GAAGAGGATAAGTGGGGAGACG<br>R: AAATGGAGGCTGAAGCGAAG  | 138                  | 99.94%                   |
| <i>napiiib</i>  | F: GGTGTTAGTCACAGTGGGGG<br>R: GGTGACAGACGTTCCGATGT    | 146                  | 98.57%                   |
| <i>pit1</i>     | F: CTGCTTCCTCCCCATCAACA<br>R: GGATAACCCACACACCAAACCA  | 141                  | 99.38%                   |
| <i>pit2</i>     | F: ATCACGAGGAGAAGGATAAGCC<br>R: CATTACACCGCCCTGGTCATA | 104                  | 99.79%                   |
| <i>pgc-1</i>    | F: GTTCCTCCGAACCTCCCAGTG<br>R: CAGACGCTCACTCCTTGTGT   | 129                  | 96.20%                   |
| <i>atgl</i>     | F: CTCCTCTCCGCAACAAGTC<br>R: TGGTGCTGTCTGGAGTGTTT     | 151                  | 98.79%                   |
| <i>cpt-1</i>    | F: CCTCAATGATACATCGGAACCC<br>R: CTGCGGCTCATCATCTAACG  | 124                  | 99.42%                   |
| <i>fas</i>      | F: AAAGTGAAGCCCTGTGTGCC<br>R: CACCCTGCCTATTACATTGCTC  | 169                  | 96.53%                   |
| <i>srebp-1c</i> | F: CCTCACTCTGCAGCCAATCA<br>R: CGTAGTCCCACCCTCAAACC    | 130                  | 99.12%                   |

*napiiia*, sodium-phosphate cotransporter iia; *napiiib*, sodium-phosphate cotransporter iib; *pit1*, sodium-phosphate cotransporter iic 1; *pit2*, sodium-phosphate cotransporter iic 2; *pgc-1*, peroxisome proliferator-activated receptor-gamma coactivator 1; *atgl*, adipose triglyceride lipase; *cpt-1*, carnitine palmitoyltransferase 1; *fas*, fatty acid synthetase; *srebp-1c*, sterol-regulatory element binding proteins 1c.
